# Supplementary material
Source: PubMed Central journal article supplement (PMC4186914)
Supplement: NIHMS619533-supplement-01.pdf [file NIHMS619533-supplement-01.pdf]

**Supplemental Table 1. Complete list of the 20 chronic conditions selected by the US-DHHS and corresponding ICD-9 codes.<sup>a</sup>**

| Description <sup>b</sup>                     | Acronym or abbreviation | CCC <sup>c</sup> | CMS (ICD-9 codes) <sup>d</sup>                                                                                                                                                                                                                                                                                                                                                                                                                                                                                                                                |
|----------------------------------------------|-------------------------|------------------|---------------------------------------------------------------------------------------------------------------------------------------------------------------------------------------------------------------------------------------------------------------------------------------------------------------------------------------------------------------------------------------------------------------------------------------------------------------------------------------------------------------------------------------------------------------|
| Hyperlipidemia                               | LIP                     | 53               | 272.0, 272.1, 272.2, 272.3, 272.4                                                                                                                                                                                                                                                                                                                                                                                                                                                                                                                             |
| Hypertension                                 | HTN                     | 98, 99           | 401.0, 401.1, 401.9, 402.00, 402.01, 402.10, 402.11, 402.90, 402.91, 403.00, 403.01, 403.10, 403.11, 403.90, 403.91, 404.00, 404.01, 404.02, 404.03, 404.10, 404.11, 404.12, 404.13, 404.90, 404.91, 404.92, 404.93, 405.01, 405.09, 405.11, 405.19, 405.91, 405.99, 362.11, 437.2                                                                                                                                                                                                                                                                            |
| Depression                                   | DEP                     | 657              | 296.20, 296.21, 296.22, 296.23, 296.24, 296.25, 296.26, 296.30, 296.31, 296.32, 296.33, 296.34, 296.35, 296.36, 296.51, 296.52, 296.53, 296.54, 296.55, 296.56, 296.60, 296.61, 296.62, 296.63, 296.64, 296.65, 296.66, 296.89, 298.0, 300.4, 309.1, 311                                                                                                                                                                                                                                                                                                      |
| Diabetes                                     | DIA                     | 49,50            | 249.00, 249.01, 249.10, 249.11, 249.20, 249.21, 249.30, 249.31, 249.40, 249.41, 249.50, 249.51, 249.60, 249.61, 249.70, 249.71, 249.80, 249.81, 249.90, 249.91, 250.00, 250.01, 250.02, 250.03, 250.10, 250.11, 250.12, 250.13, 250.20, 250.21, 250.22, 250.23, 250.30, 250.31, 250.32, 250.33, 250.40, 250.41, 250.42, 250.43, 250.50, 250.51, 250.52, 250.53, 250.60, 250.61, 250.62, 250.63, 250.70, 250.71, 250.72, 250.73, 250.80, 250.81, 250.82, 250.83, 250.90, 250.91, 250.92, 250.93, 357.2, 362.01, 362.02, 362.03, 362.04, 362.05, 362.06, 366.41 |
| Arthritis                                    | ART                     | 202, 203         | 714.0, 714.1, 714.2, 714.30, 714.31, 714.32, 714.33, 715.00, 715.04, 715.09, 715.10, 715.11, 715.12, 715.13, 715.14, 715.15, 715.16, 715.17, 715.18, 715.20, 715.21, 715.22, 715.23, 715.24, 715.25, 715.26, 715.27, 715.28, 715.30, 715.31, 715.32, 715.33, 715.34, 715.35, 715.36, 715.37, 715.38, 715.80, 715.89, 715.90, 715.91, 715.92, 715.93, 715.94, 715.95, 715.96, 715.97, 715.98, 720.0, 721.0, 721.1, 721.2, 721.3, 721.90, 721.91                                                                                                                |
| Cancer                                       | CAN                     | 11-43            | Female breast cancer: 174.0, 174.1, 174.2, 174.3, 174.4, 174.5, 174.6, 174.8, 174.9, 175.0, 175.9, 233.0, V10.3. Colorectal cancer: 154.0, 154.1, 153.0, 153.1, 153.2, 153.3, 153.4, 153.5, 153.6, 153.7, 153.8, 153.9, 230.3, 230.4, V10.05. Prostate cancer: 185, 233.4, V10.46. Lung cancer: 162.2, 162.3, 162.4, 162.5, 162.8, 162.9, 231.2, V10.11.                                                                                                                                                                                                      |
| Cardiac arrhythmias                          | ARR                     | 105-106          | 427.31                                                                                                                                                                                                                                                                                                                                                                                                                                                                                                                                                        |
| Asthma                                       | AST                     | 128              | 493.00, 493.01, 493.02, 493.10, 493.11, 493.12, 493.20, 493.21, 493.22, 493.81, 493.82, 493.90, 493.91, 493.92                                                                                                                                                                                                                                                                                                                                                                                                                                                |
| Coronary artery disease                      | CAD                     | 100, 101         | 410.00, 410.01, 410.02, 410.10, 410.11, 410.12, 410.20, 410.21, 410.22, 410.30, 410.31, 410.32, 410.40, 410.41, 410.42, 410.50, 410.51, 410.52, 410.60, 410.61, 410.62, 410.70, 410.71, 410.72, 410.80, 410.81, 410.82, 410.90, 410.91, 410.92, 411.0, 411.1, 411.81, 411.89, 412, 413.0, 413.1, 413.9, 414.00, 414.01, 414.02, 414.03, 414.04, 414.05, 414.06, 414.07, 414.12, 414.2, 414.3, 414.8, 414.9                                                                                                                                                    |
| Substance abuse disorders (drug and alcohol) | SUB                     | 660-661          | Not applicable                                                                                                                                                                                                                                                                                                                                                                                                                                                                                                                                                |

**Supplemental Table 1. Continued.**

| Description <sup>b</sup>                                    | Acronym or abbreviation | CCC <sup>c</sup>            | CMS (ICD-9 codes) <sup>d</sup>                                                                                                                                                                                                                                                                                                                                                                                                                                                                                                                                                                                                                                                                                            |
|-------------------------------------------------------------|-------------------------|-----------------------------|---------------------------------------------------------------------------------------------------------------------------------------------------------------------------------------------------------------------------------------------------------------------------------------------------------------------------------------------------------------------------------------------------------------------------------------------------------------------------------------------------------------------------------------------------------------------------------------------------------------------------------------------------------------------------------------------------------------------------|
| Chronic obstructive pulmonary disease                       | COPD                    | 127                         | 490, 491.0, 491.1, 491.20, 491.21, 491.22, 491.8, 491.9, 492.0, 492.8, 494.0, 494.1, 496                                                                                                                                                                                                                                                                                                                                                                                                                                                                                                                                                                                                                                  |
| Osteoporosis                                                | OST                     | 206                         | 733.00, 733.01, 733.02, 733.03, 733.09                                                                                                                                                                                                                                                                                                                                                                                                                                                                                                                                                                                                                                                                                    |
| Chronic kidney disease                                      | CKD                     | 158                         | 016.00, 016.01, 016.02, 016.03, 016.04, 016.05, 016.06, 095.4, 189.0, 189.9, 223.0, 236.91, 249.40, 249.41, 250.40, 250.41, 250.42, 250.43, 271.4, 274.10, 283.11, 403.01, 403.11, 403.91, 404.02, 404.03, 404.12, 404.13, 404.92, 404.93, 440.1, 442.1, 572.4, 580.0, 580.4, 580.81, 580.89, 580.9, 581.0, 581.1, 581.2, 581.3, 581.81, 581.89, 581.9, 582.0, 582.1, 582.2, 582.4, 582.81, 582.89, 582.9, 583.0, 583.1, 583.2, 583.4, 583.6, 583.7, 583.81, 583.89, 583.9, 584.5, 584.6, 584.7, 584.8, 584.9, 585.1, 585.2, 585.3, 585.4, 585.5, 585.6, 585.9, 586, 587, 588.0, 588.1, 588.81, 588.89, 588.9, 591, 753.12, 753.13, 753.14, 753.15, 753.16, 753.17, 753.19, 753.20, 753.21, 753.22, 753.23, 753.29, 794.4 |
| Stroke                                                      | STR                     | 109-112                     | 430, 431, 433.01, 433.11, 433.21, 433.31, 433.81, 433.91, 434.00, 434.01, 434.10, 434.11, 434.90, 434.91, 435.0, 435.1, 435.3, 435.8, 435.9, 436, 997.02                                                                                                                                                                                                                                                                                                                                                                                                                                                                                                                                                                  |
| Congestive heart failure                                    | CHF                     | 108                         | 398.91, 402.01, 402.11, 402.91, 404.01, 404.11, 404.91, 404.03, 404.13, 404.93, 428.0, 428.1, 428.20, 428.21, 428.22, 428.23, 428.30, 428.31, 428.32, 428.33, 428.40, 428.41, 428.42, 428.43, 428.9                                                                                                                                                                                                                                                                                                                                                                                                                                                                                                                       |
| Dementia (including Alzheimer's and other senile dementias) | DEM                     | 653                         | 331.0, 331.11, 331.19, 331.2, 331.7, 290.0, 290.10, 290.11, 290.12, 290.13, 290.20, 290.21, 290.3, 290.40, 290.41, 290.42, 290.43, 294.0, 294.10, 294.11, 294.8, 797                                                                                                                                                                                                                                                                                                                                                                                                                                                                                                                                                      |
| Schizophrenia                                               | SZO                     | 659                         | Not applicable                                                                                                                                                                                                                                                                                                                                                                                                                                                                                                                                                                                                                                                                                                            |
| Hepatitis                                                   | HEP                     | 6                           | Not applicable                                                                                                                                                                                                                                                                                                                                                                                                                                                                                                                                                                                                                                                                                                            |
| Autism spectrum disorder                                    | AUT                     | 299.00, 299.01 <sup>e</sup> | Not applicable                                                                                                                                                                                                                                                                                                                                                                                                                                                                                                                                                                                                                                                                                                            |
| Human immunodeficiency virus (HIV)                          | HIV                     | 5                           | Not applicable                                                                                                                                                                                                                                                                                                                                                                                                                                                                                                                                                                                                                                                                                                            |

<sup>a</sup> CCC = Clinical Classification Codes; CMS = Centers for Medicare and Medicaid Services; ICD-9 = International Classification of Diseases, 9<sup>th</sup> revision; US-DHHS = US Department of Health and Human Services.

<sup>b</sup> The 20 conditions were defined by the US-DHHS as detailed elsewhere. Goodman et al,<sup>3</sup> 2013. Each condition is defined by having a code in either the CCC group of codes or the CMS group of codes. Conditions are listed in decreasing order of frequency (by overall age and sex standardized prevalence; same order as in Figure 1).

<sup>c</sup> We list the CCC chapters developed by the Agency for Healthcare Research and Quality (AHRQ). Each CCC chapter includes a list of ICD-9 codes as detailed elsewhere. Cohen et al,<sup>18</sup> 2009.

<sup>d</sup> We list the ICD-9 codes defined in the Chronic Conditions Data Warehouse of the CMS.

<sup>e</sup> Autism-spectrum disorder is not defined in either the CCC or the CMS code groupings, but rather is defined by two distinct ICD-9 codes.
