# Supplementary material
Source: PubMed Central journal article supplement (PMC4186914)
Supplement: NIHMS619533-supplement-02.pdf [file NIHMS619533-supplement-02.pdf]

**Supplemental Table 2. Age- and sex-specific prevalence (per 100 population) of the 20 chronic conditions considered individually. <sup>a</sup>**

| Condition                  | Age group (years) <sup>b</sup> |     |       |      |       |      |       |      |       |      |       |      |       |      |        |      |
|----------------------------|--------------------------------|-----|-------|------|-------|------|-------|------|-------|------|-------|------|-------|------|--------|------|
|                            | 0-19                           |     | 20-39 |      | 40-49 |      | 50-59 |      | 60-69 |      | 70-79 |      | ≥ 80  |      | ≥ 65   |      |
|                            | No.                            | %   | No.   | %    | No.   | %    | No.   | %    | No.   | %    | No.   | %    | No.   | %    | No.    | %    |
| <b>Hyperlipidemia</b>      |                                |     |       |      |       |      |       |      |       |      |       |      |       |      |        |      |
| Both sexes                 | 47                             | 0.1 | 1,390 | 3.6  | 3,125 | 16.8 | 6,296 | 33.2 | 5,946 | 50.6 | 4,719 | 64.8 | 2,971 | 58.1 | 10,556 | 60.0 |
| Men                        | 24                             | 0.1 | 822   | 4.6  | 1,893 | 21.1 | 3,404 | 37.7 | 2,911 | 52.9 | 2,227 | 66.3 | 1,209 | 63.5 | 4,833  | 62.7 |
| Women                      | 23                             | 0.1 | 568   | 2.7  | 1,232 | 12.8 | 2,892 | 29.1 | 3,035 | 48.6 | 2,492 | 63.6 | 1,762 | 54.9 | 5,723  | 57.8 |
| <b>Hypertension</b>        |                                |     |       |      |       |      |       |      |       |      |       |      |       |      |        |      |
| Both sexes                 | 47                             | 0.1 | 940   | 2.4  | 2,117 | 11.4 | 4,513 | 23.8 | 5,037 | 42.9 | 4,396 | 60.4 | 3,767 | 73.7 | 10,706 | 60.8 |
| Men                        | 26                             | 0.1 | 497   | 2.8  | 1,156 | 12.9 | 2,302 | 25.5 | 2,414 | 43.8 | 2,029 | 60.4 | 1,377 | 72.4 | 4,624  | 60.0 |
| Women                      | 21                             | 0.1 | 443   | 2.1  | 961   | 10.0 | 2,211 | 22.2 | 2,623 | 42.0 | 2,367 | 60.4 | 2,390 | 74.5 | 6,082  | 61.5 |
| <b>Depression</b>          |                                |     |       |      |       |      |       |      |       |      |       |      |       |      |        |      |
| Both sexes                 | 1,070                          | 2.8 | 5,116 | 13.1 | 2,771 | 14.9 | 2,743 | 14.5 | 1,411 | 12.0 | 744   | 10.2 | 807   | 15.8 | 2,117  | 12.0 |
| Men                        | 432                            | 2.2 | 1,492 | 8.3  | 937   | 10.4 | 901   | 10.0 | 471   | 8.6  | 254   | 7.6  | 241   | 12.7 | 682    | 8.8  |
| Women                      | 638                            | 3.4 | 3,624 | 17.2 | 1,834 | 19.0 | 1,842 | 18.5 | 940   | 15.0 | 490   | 12.5 | 566   | 17.6 | 1,435  | 14.5 |
| <b>Diabetes</b>            |                                |     |       |      |       |      |       |      |       |      |       |      |       |      |        |      |
| Both sexes                 | 110                            | 0.3 | 895   | 2.3  | 1,481 | 8.0  | 3,014 | 15.9 | 3,128 | 26.6 | 2,632 | 36.2 | 1,673 | 32.7 | 5,873  | 33.4 |
| Men                        | 53                             | 0.3 | 399   | 2.2  | 801   | 8.9  | 1,611 | 17.8 | 1,657 | 30.1 | 1,336 | 39.8 | 731   | 38.4 | 2,892  | 37.5 |
| Women                      | 57                             | 0.3 | 496   | 2.4  | 680   | 7.0  | 1,403 | 14.1 | 1,471 | 23.5 | 1,296 | 33.1 | 942   | 29.4 | 2,981  | 30.1 |
| <b>Arthritis</b>           |                                |     |       |      |       |      |       |      |       |      |       |      |       |      |        |      |
| Both sexes                 | 46                             | 0.1 | 412   | 1.1  | 1,054 | 5.7  | 2,496 | 13.2 | 2,610 | 22.2 | 2,390 | 32.8 | 2,020 | 39.5 | 5,693  | 32.3 |
| Men                        | 23                             | 0.1 | 164   | 0.9  | 449   | 5.0  | 973   | 10.8 | 973   | 17.7 | 908   | 27.0 | 662   | 34.8 | 2,058  | 26.7 |
| Women                      | 23                             | 0.1 | 248   | 1.2  | 605   | 6.3  | 1,523 | 15.3 | 1,637 | 26.2 | 1,482 | 37.8 | 1,358 | 42.3 | 3,635  | 36.7 |
| <b>Cancer</b>              |                                |     |       |      |       |      |       |      |       |      |       |      |       |      |        |      |
| Both sexes                 | 64                             | 0.2 | 558   | 1.4  | 782   | 4.2  | 1,566 | 8.3  | 1,884 | 16.0 | 2,131 | 29.3 | 1,850 | 36.2 | 5,007  | 28.4 |
| Men                        | 38                             | 0.2 | 165   | 0.9  | 279   | 3.1  | 655   | 7.2  | 942   | 17.1 | 1,170 | 34.8 | 886   | 46.6 | 2,581  | 33.5 |
| Women                      | 26                             | 0.1 | 393   | 1.9  | 503   | 5.2  | 911   | 9.2  | 942   | 15.1 | 961   | 24.5 | 964   | 30.0 | 2,426  | 24.5 |
| <b>Cardiac arrhythmias</b> |                                |     |       |      |       |      |       |      |       |      |       |      |       |      |        |      |
| Both sexes                 | 175                            | 0.5 | 816   | 2.1  | 618   | 3.3  | 1,045 | 5.5  | 1,231 | 10.5 | 1,744 | 24.0 | 2,128 | 41.6 | 4,539  | 25.8 |
| Men                        | 84                             | 0.4 | 245   | 1.4  | 260   | 2.9  | 551   | 6.1  | 688   | 12.5 | 965   | 28.7 | 955   | 50.2 | 2,309  | 30.0 |
| Women                      | 91                             | 0.5 | 571   | 2.7  | 358   | 3.7  | 494   | 5.0  | 543   | 8.7  | 779   | 19.9 | 1,173 | 36.6 | 2,230  | 22.5 |

**Supplemental Table 2. Continued**

| Condition                        | Age group (years) <sup>b</sup> |      |       |     |       |     |       |     |       |      |       |      |       |      |       |      |
|----------------------------------|--------------------------------|------|-------|-----|-------|-----|-------|-----|-------|------|-------|------|-------|------|-------|------|
|                                  | 0-19                           |      | 20-39 |     | 40-49 |     | 50-59 |     | 60-69 |      | 70-79 |      | ≥ 80  |      | ≥ 65  |      |
|                                  | No.                            | %    | No.   | %   | No.   | %   | No.   | %   | No.   | %    | No.   | %    | No.   | %    | No.   | %    |
| <b>Asthma</b>                    |                                |      |       |     |       |     |       |     |       |      |       |      |       |      |       |      |
| Both sexes                       | 2,297                          | 6.0  | 1,772 | 4.5 | 884   | 4.7 | 907   | 4.8 | 551   | 4.7  | 361   | 5.0  | 261   | 5.1  | 855   | 4.9  |
| Men                              | 1,307                          | 6.8  | 555   | 3.1 | 277   | 3.1 | 289   | 3.2 | 165   | 3.0  | 123   | 3.7  | 82    | 4.3  | 279   | 3.6  |
| Women                            | 990                            | 5.3  | 1,217 | 5.8 | 607   | 6.3 | 618   | 6.2 | 386   | 6.2  | 238   | 6.1  | 179   | 5.6  | 576   | 5.8  |
| <b>CAD</b>                       |                                |      |       |     |       |     |       |     |       |      |       |      |       |      |       |      |
| Both sexes                       | 3                              | <0.1 | 43    | 0.1 | 205   | 1.1 | 757   | 4.0 | 1,316 | 11.2 | 1,604 | 22.0 | 1,587 | 31.0 | 3,930 | 22.3 |
| Men                              | 1                              | <0.1 | 29    | 0.2 | 148   | 1.6 | 569   | 6.3 | 937   | 17.0 | 1,036 | 30.8 | 836   | 43.9 | 2,385 | 30.9 |
| Women                            | 2                              | <0.1 | 14    | 0.1 | 57    | 0.6 | 188   | 1.9 | 379   | 6.1  | 568   | 14.5 | 751   | 23.4 | 1,545 | 15.6 |
| <b>Substance abuse disorders</b> |                                |      |       |     |       |     |       |     |       |      |       |      |       |      |       |      |
| Both sexes                       | 219                            | 0.6  | 1,397 | 3.6 | 702   | 3.8 | 576   | 3.0 | 227   | 1.9  | 102   | 1.4  | 53    | 1.0  | 244   | 1.4  |
| Men                              | 110                            | 0.6  | 746   | 4.1 | 401   | 4.5 | 354   | 3.9 | 151   | 2.7  | 63    | 1.9  | 29    | 1.5  | 150   | 1.9  |
| Women                            | 109                            | 0.6  | 651   | 3.1 | 301   | 3.1 | 222   | 2.2 | 76    | 1.2  | 39    | 1.0  | 24    | 0.7  | 94    | 1.0  |
| <b>COPD</b>                      |                                |      |       |     |       |     |       |     |       |      |       |      |       |      |       |      |
| Both sexes                       | 249                            | 0.7  | 279   | 0.7 | 289   | 1.6 | 476   | 2.5 | 562   | 4.8  | 613   | 8.4  | 607   | 11.9 | 1,523 | 8.7  |
| Men                              | 139                            | 0.7  | 82    | 0.5 | 112   | 1.2 | 211   | 2.3 | 272   | 4.9  | 310   | 9.2  | 266   | 14.0 | 725   | 9.4  |
| Women                            | 110                            | 0.6  | 197   | 0.9 | 177   | 1.8 | 265   | 2.7 | 290   | 4.6  | 303   | 7.7  | 341   | 10.6 | 798   | 8.1  |
| <b>Osteoporosis</b>              |                                |      |       |     |       |     |       |     |       |      |       |      |       |      |       |      |
| Both sexes                       | 1                              | <0.1 | 31    | 0.1 | 70    | 0.4 | 313   | 1.6 | 612   | 5.2  | 840   | 11.5 | 1,136 | 22.2 | 2,325 | 13.2 |
| Men                              | 1                              | <0.1 | 11    | 0.1 | 29    | 0.3 | 59    | 0.7 | 61    | 1.1  | 86    | 2.6  | 135   | 7.1  | 255   | 3.3  |
| Women                            | 0                              | 0.0  | 20    | 0.1 | 41    | 0.4 | 254   | 2.6 | 551   | 8.8  | 754   | 19.2 | 1,001 | 31.2 | 2,070 | 20.9 |
| <b>CKD</b>                       |                                |      |       |     |       |     |       |     |       |      |       |      |       |      |       |      |
| Both sexes                       | 121                            | 0.3  | 200   | 0.5 | 194   | 1.0 | 356   | 1.9 | 478   | 4.1  | 598   | 8.2  | 815   | 15.9 | 1,694 | 9.6  |
| Men                              | 80                             | 0.4  | 90    | 0.5 | 110   | 1.2 | 202   | 2.2 | 252   | 4.6  | 348   | 10.4 | 389   | 20.4 | 884   | 11.5 |
| Women                            | 41                             | 0.2  | 110   | 0.5 | 84    | 0.9 | 154   | 1.5 | 226   | 3.6  | 250   | 6.4  | 426   | 13.3 | 810   | 8.2  |
| <b>Stroke</b>                    |                                |      |       |     |       |     |       |     |       |      |       |      |       |      |       |      |
| Both sexes                       | 18                             | <0.1 | 56    | 0.1 | 63    | 0.3 | 157   | 0.8 | 302   | 2.6  | 500   | 6.9  | 579   | 11.3 | 1,253 | 7.1  |
| Men                              | 12                             | 0.1  | 25    | 0.1 | 32    | 0.4 | 88    | 1.0 | 168   | 3.1  | 273   | 8.1  | 269   | 14.1 | 641   | 8.3  |
| Women                            | 6                              | <0.1 | 31    | 0.1 | 31    | 0.3 | 69    | 0.7 | 134   | 2.1  | 227   | 5.8  | 310   | 9.7  | 612   | 6.2  |

**Supplemental Table 2. Continued**

| Condition                       | Age group (years) <sup>b</sup> |      |       |      |       |      |       |      |       |      |       |      |      |      |       |      |
|---------------------------------|--------------------------------|------|-------|------|-------|------|-------|------|-------|------|-------|------|------|------|-------|------|
|                                 | 0-19                           |      | 20-39 |      | 40-49 |      | 50-59 |      | 60-69 |      | 70-79 |      | ≥ 80 |      | ≥ 65  |      |
|                                 | No.                            | %    | No.   | %    | No.   | %    | No.   | %    | No.   | %    | No.   | %    | No.  | %    | No.   | %    |
| <b>CHF</b>                      |                                |      |       |      |       |      |       |      |       |      |       |      |      |      |       |      |
| Both sexes                      | 3                              | <0.1 | 26    | 0.1  | 33    | 0.2  | 119   | 0.6  | 185   | 1.6  | 356   | 4.9  | 700  | 13.7 | 1,162 | 6.6  |
| Men                             | 1                              | <0.1 | 17    | 0.1  | 20    | 0.2  | 81    | 0.9  | 112   | 2.0  | 181   | 5.4  | 283  | 14.9 | 527   | 6.8  |
| Women                           | 2                              | <0.1 | 9     | <0.1 | 13    | 0.1  | 38    | 0.4  | 73    | 1.2  | 175   | 4.5  | 417  | 13.0 | 635   | 6.4  |
| <b>Dementia</b>                 |                                |      |       |      |       |      |       |      |       |      |       |      |      |      |       |      |
| Both sexes                      | 30                             | 0.1  | 84    | 0.2  | 79    | 0.4  | 102   | 0.5  | 116   | 1.0  | 232   | 3.2  | 690  | 13.5 | 979   | 5.6  |
| Men                             | 17                             | 0.1  | 53    | 0.3  | 44    | 0.5  | 54    | 0.6  | 53    | 1.0  | 107   | 3.2  | 225  | 11.8 | 356   | 4.6  |
| Women                           | 13                             | 0.1  | 31    | 0.1  | 35    | 0.4  | 48    | 0.5  | 63    | 1.0  | 125   | 3.2  | 465  | 14.5 | 623   | 6.3  |
| <b>Schizophrenia</b>            |                                |      |       |      |       |      |       |      |       |      |       |      |      |      |       |      |
| Both sexes                      | 20                             | 0.1  | 227   | 0.6  | 148   | 0.8  | 151   | 0.8  | 98    | 0.8  | 70    | 1.0  | 136  | 2.7  | 243   | 1.4  |
| Men                             | 11                             | 0.1  | 147   | 0.8  | 74    | 0.8  | 77    | 0.9  | 32    | 0.6  | 27    | 0.8  | 46   | 2.4  | 86    | 1.1  |
| Women                           | 9                              | <0.1 | 80    | 0.4  | 74    | 0.8  | 74    | 0.7  | 66    | 1.1  | 43    | 1.1  | 90   | 2.8  | 157   | 1.6  |
| <b>Hepatitis</b>                |                                |      |       |      |       |      |       |      |       |      |       |      |      |      |       |      |
| Both sexes                      | 23                             | 0.1  | 153   | 0.4  | 165   | 0.9  | 179   | 0.9  | 88    | 0.7  | 47    | 0.6  | 18   | 0.4  | 97    | 0.6  |
| Men                             | 12                             | 0.1  | 70    | 0.4  | 101   | 1.1  | 113   | 1.3  | 47    | 0.9  | 25    | 0.7  | 5    | 0.3  | 44    | 0.6  |
| Women                           | 11                             | 0.1  | 83    | 0.4  | 64    | 0.7  | 66    | 0.7  | 41    | 0.7  | 22    | 0.6  | 13   | 0.4  | 53    | 0.5  |
| <b>Autism spectrum disorder</b> |                                |      |       |      |       |      |       |      |       |      |       |      |      |      |       |      |
| Both sexes                      | 84                             | 0.2  | 10    | <0.1 | 2     | <0.1 | 0     | 0.0  | 0     | 0.0  | 0     | 0.0  | 0    | 0.0  | 0     | 0.0  |
| Men                             | 67                             | 0.3  | 7     | <0.1 | 2     | <0.1 | 0     | 0.0  | 0     | 0.0  | 0     | 0.0  | 0    | 0.0  | 0     | 0.0  |
| Women                           | 17                             | 0.1  | 3     | <0.1 | 0     | 0.0  | 0     | 0.0  | 0     | 0.0  | 0     | 0.0  | 0    | 0.0  | 0     | 0.0  |
| <b>HIV</b>                      |                                |      |       |      |       |      |       |      |       |      |       |      |      |      |       |      |
| Both sexes                      | 7                              | <0.1 | 26    | 0.1  | 29    | 0.2  | 11    | 0.1  | 3     | <0.1 | 2     | <0.1 | 0    | 0.0  | 3     | <0.1 |
| Men                             | 2                              | <0.1 | 13    | 0.1  | 20    | 0.2  | 9     | 0.1  | 2     | <0.1 | 1     | <0.1 | 0    | 0.0  | 1     | <0.1 |
| Women                           | 5                              | <0.1 | 13    | 0.1  | 9     | 0.1  | 2     | <0.1 | 1     | <0.1 | 1     | <0.1 | 0    | 0.0  | 2     | <0.1 |

<sup>a</sup> CAD = coronary artery disease; COPD = chronic obstructive pulmonary disease; CKD = chronic kidney disease; CHF = congestive heart failure; HIV = human immunodeficiency virus

<sup>b</sup> Numbers to the left of the prevalence figure indicate the actual number of cases observed. Prevalence can be computed by dividing the number of cases by the following corresponding denominators and multiplying by 100. Denominators for men and women combined 0-19 = 38,025; 20-39 = 39,079; 40-49 = 18,628; 50-59 = 18,980; 60-69 = 11,754; 70-79 = 7,280; ≥80 = 5,112; ≥65 = 17,601. Denominators for men: 0-19 = 19,316; 20-39 = 18,028; 40-49 = 8,978; 50-59 = 9,036; 60-69 = 5,506; 70-79 = 3,359; ≥80 = 1,903; ≥65 = 7,707. Denominators for women: 0-19 = 18,709; 20-39 = 21,051; 40-49 = 9,650; 50-59 = 9,944; 60-69 = 6,248; 70-79 = 3,921; ≥80 = 3,209; ≥65 = 9,894.
