# Supplementary material
Source: PubMed Central journal article supplement (PMC4186914)
Supplement: NIHMS619533-supplement-03.pdf [file NIHMS619533-supplement-03.pdf]

**Supplemental Table 3. Comparison of the prevalence of selected chronic conditions in persons ages 65 and older in Olmsted County, MN and in the national database of the Centers for Medicare and Medicaid Services (CMS).<sup>a</sup>**

| Chronic condition                | Olmsted County, MN        |                                             |                           |                                             | CMS <sup>e</sup><br>Prevalence (%) |
|----------------------------------|---------------------------|---------------------------------------------|---------------------------|---------------------------------------------|------------------------------------|
|                                  | Definition 1 <sup>b</sup> |                                             | Definition 2 <sup>c</sup> |                                             |                                    |
|                                  | Prevalence<br>crude (%)   | Prevalence<br>standardized (%) <sup>d</sup> | Prevalence<br>crude (%)   | Prevalence<br>standardized (%) <sup>d</sup> |                                    |
| Hypertension                     | 60.8                      | 60.5                                        | 52.3                      | 52.0                                        | 59.6                               |
| Hyperlipidemia                   | 60.0                      | 60.0                                        | 49.2                      | 49.3                                        | 45.4                               |
| Coronary artery disease          | 22.3                      | 21.9                                        | 18.2                      | 17.9                                        | 34.5                               |
| Diabetes                         | 33.4                      | 33.4                                        | 32.3                      | 32.4                                        | 26.9                               |
| Arthritis                        | 32.3                      | 32.2                                        | 22.9                      | 22.8                                        | 22.2                               |
| Congestive heart failure         | 6.6                       | 6.4                                         | 6.0                       | 5.8                                         | 18.0                               |
| Depression                       | 12.0                      | 12.0                                        | 8.8                       | 8.7                                         | 10.7                               |
| Chronic kidney disease           | 9.6                       | 9.4                                         | 9.0                       | 8.8                                         | 13.1                               |
| Osteoporosis                     | 13.2                      | 13.2                                        | 10.1                      | 10.0                                        | 13.9                               |
| Dementia <sup>f</sup>            | 5.6                       | 5.3                                         | 5.6                       | 5.4                                         | 12.6                               |
| COPD                             | 8.7                       | 8.6                                         | 7.7                       | 7.6                                         | 11.1                               |
| Cardiac arrhythmias <sup>g</sup> | 25.8                      | 25.3                                        | 22.6                      | 22.1                                        | 8.9                                |
| Cancer <sup>h</sup>              | 28.4                      | 28.2                                        | 22.4                      | 22.3                                        | 7.4                                |
| Asthma                           | 4.9                       | 4.9                                         | 3.7                       | 3.7                                         | 4.0                                |
| Stroke                           | 7.1                       | 7.0                                         | 5.6                       | 5.5                                         | 4.6                                |

<sup>a</sup> CMS = Centers for Medicare and Medicaid Services; COPD = chronic obstructive pulmonary disease; DHHS = Department of Health and Human Services.

<sup>b</sup> Definition 1 = two or more diagnoses separated by more than 30 days within the 5 years before prevalence date.

<sup>c</sup> Definition 2 = any one diagnosis within the 1 year before prevalence date. This is the same definition that was used in the CMS study.

<sup>d</sup> The prevalence was standardized by age and sex to the 2010 US census population aged 65 years and older.

<sup>e</sup> Data were obtained from CMS administrative claims data, January to December 2008. Salive et al,<sup>5</sup> 2013.

<sup>f</sup> We included all dementia related disorders as defined by the DHHS criteria. Goodman et al,<sup>3</sup> 2013. The CMS study included only Alzheimer's disease. Salive et al,<sup>5</sup> 2013.

<sup>g</sup> We included all cardiac arrhythmias as defined by the DHHS criteria. Goodman et al,<sup>3</sup> 2013. The CMS study included only atrial fibrillation. Salive et al,<sup>5</sup> 2013.

<sup>h</sup> We included cancer of all sites as defined by the DHHS criteria. Goodman et al,<sup>3</sup> 2013. The CMS study included only breast, colon, lung, and prostate cancers. Salive et al,<sup>5</sup> 2013.
